# Supplementary material
Source: PubMed Central journal article supplement (PMC4259199)
Supplement: Supp_Figure1.pdf [file Supp_Figure1.pdf]

## Supplementary Data

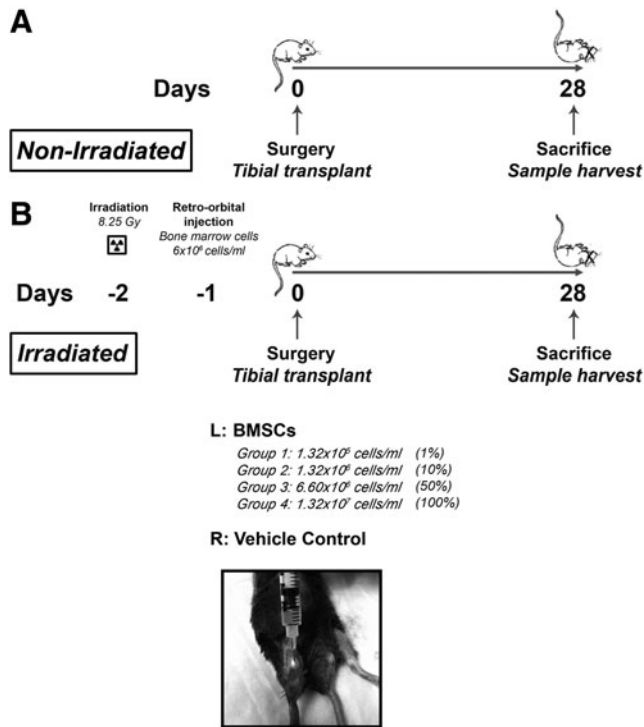

**SUPPLEMENTARY FIG. S1.** Intramedullary tibial transplantation model. **(A, B)** Timeline and experimental design. Total body irradiation (TBI) at 8.25 Gy (–2 days) followed by a rescuing retro-orbital injection of whole BM cells at  $6.0 \times 10^5$  cells/mL (–1 days) and intramedullary tibial transplantation. Treatment groups: left tibiae, bone marrow-derived mesenchymal stem/stromal cells (BMSCs) at  $1.32 \times 10^5$  (1%),  $1.32 \times 10^6$  (10%),  $6.60 \times 10^6$  (50%), or  $1.32 \times 10^7$  cells/mL (100%); right tibiae, vehicle control. The clinical picture shows the right knee (top view) of an isoflurane-anesthetized mouse, flexed to  $90^\circ$ , with a 26-gauge needle inserted into the joint surface of the tibia through the patellar tendon reaching into the medullary space during injection ( $n=7$  animals per group).
