# Supplementary material
Source: PubMed Central journal article supplement (PMC4259199)
Supplement: Supp_Figure2.pdf [file Supp_Figure2.pdf]

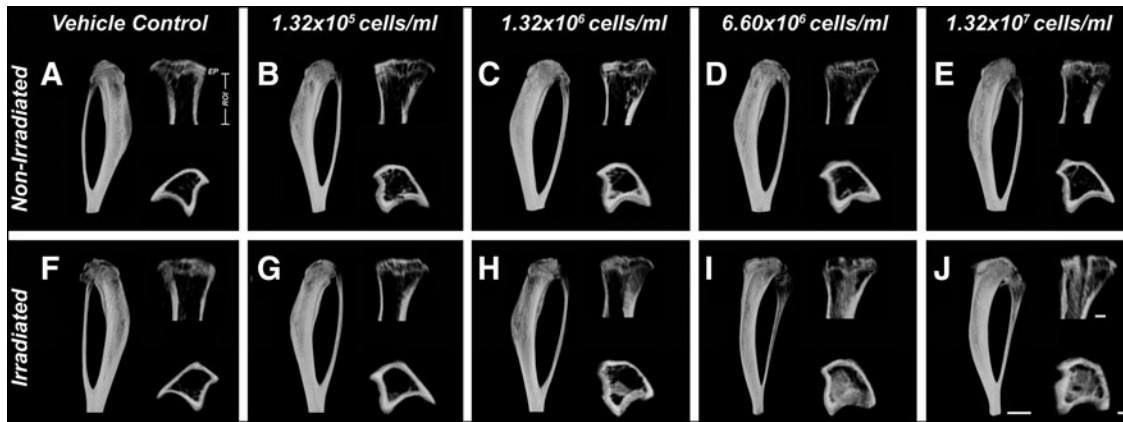

**SUPPLEMENTARY FIG. S2.** TBI permits transplanted BMSC engraftment and subsequent new bone formation in a cell dose-dependent fashion. Representative three-dimensional reconstructions of microcomputed tomography ( $\mu$ CT) images 4 weeks post-transplantation (side, coronal, and transverse view; region of interest: starting immediately beyond the epiphyseal plate and extending 2 mm distally by transaxial tracing for 135 cuts). (**A–E**) Nonirradiated and (**F–J**) irradiated animals. (**A, F**) Vehicle-transplanted (right) tibiae and BMSC-transplanted (left) tibiae at (**B, G**)  $1.32 \times 10^5$  (1%), (**C, H**)  $1.32 \times 10^6$  (10%), (**D, I**)  $6.60 \times 10^6$  (50%), or (**E, J**)  $1.32 \times 10^7$  cells/mL (100%) (EP: epiphyseal plate, side view: scale bar 1 mm, coronal and transverse views: scale bar 500  $\mu$ m,  $n=7$  animals per group).
