# Supplementary material
Source: PubMed Central journal article supplement (PMC4259199)
Supplement: Supp_Figure3.pdf [file Supp_Figure3.pdf]

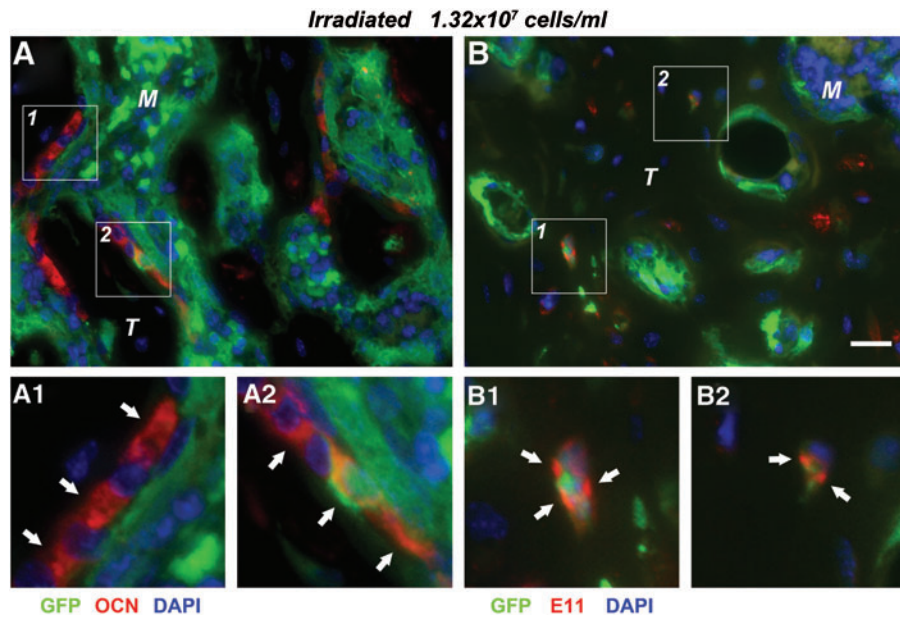

**SUPPLEMENTARY FIG. S3.** TBI permits BMSC engraftment and new bone formation. (**A**, **B**) Representative fluorescence micrographs of the proximal tibia marrow space in irradiation-preconditioned BMSC-transplanted tibiae at  $1.32 \times 10^7$  cells/mL 4 weeks post-transplantation. (**A**, **B1**, **2**) Osteocalcin (OCN)-positive osteoblasts lining trabecular structures with few of them co-expressing GFP (arrows); maturing osteocytes embedded in the bone matrix, some of them also co-expressing E11 (arrows) (M: marrow, T: trabecular bone,  $40\times$ , scale bar  $40\ \mu\text{m}$ , GFP=green, OCN=red (**A1**, **2**), E11=red (**B1**, **2**), 4',6-diamidino-2-phenylindole [DAPI]=blue,  $n=7$  animals per group).
